# Supplementary material
Source: Springer Nature journal article supplement (https://www.springermedizin.de/resource/supplementary/13054_2010_9530_MOESM4_ESM.pdf/9706364)

# Thalamus

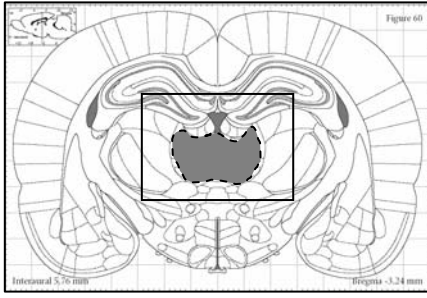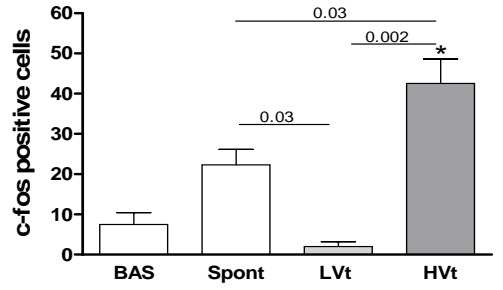

**cresyl**

**cfos**

**BAS**

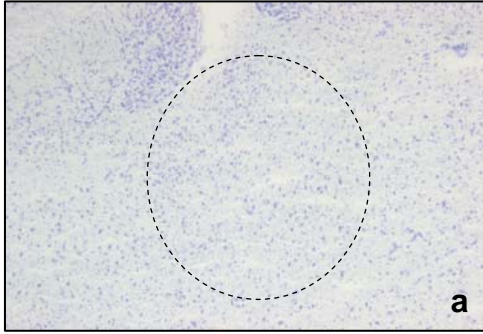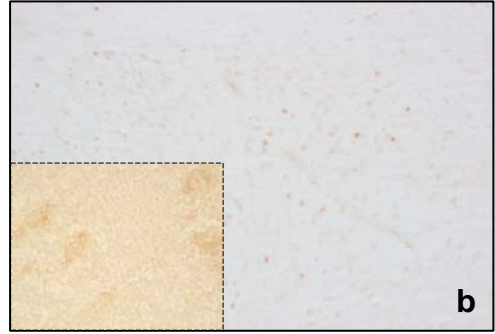

**a**

**b**

**Spont**

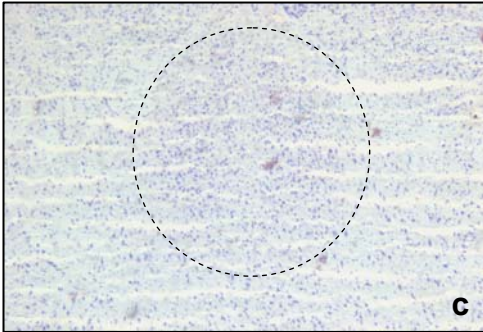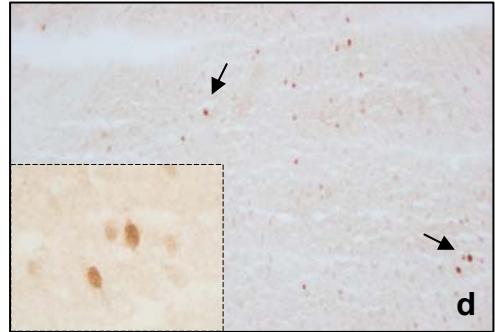

**c**

**d**

**LVt**

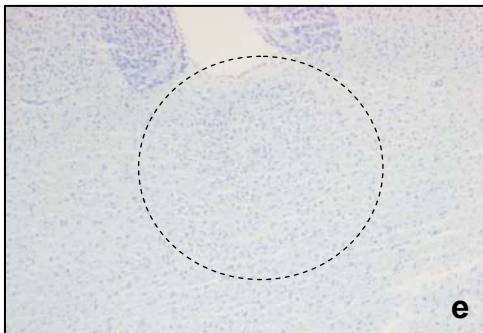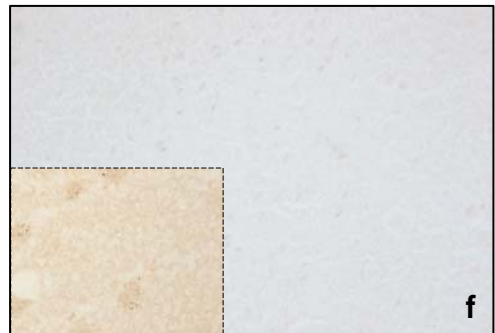

**e**

**f**

**HVt**

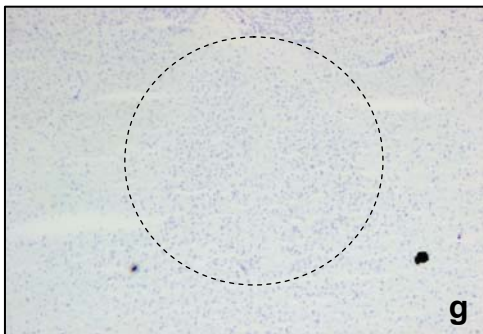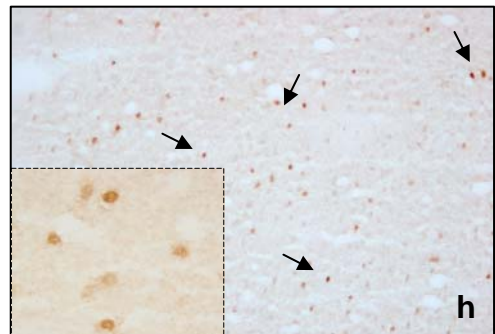

**g**

**h**

Supplement: MOESM4 [file 9706364]
